# Supplementary material for: Menopause, hysterectomy, menopausal hormone therapy and cause-specific mortality: cohort study of UK Biobank participants
Source: PubMed Central journal article supplement — Hum Reprod. 2022 Jun 12;37(9):2175–85. doi: 10.1093/humrep/deac137 (PMC9433845; doi:10.1093/humrep/deac137), 2022-06-12
Supplement: deac137_supplementary_figure_s1.pdf [file deac137_supplementary_figure_s1.pdf]

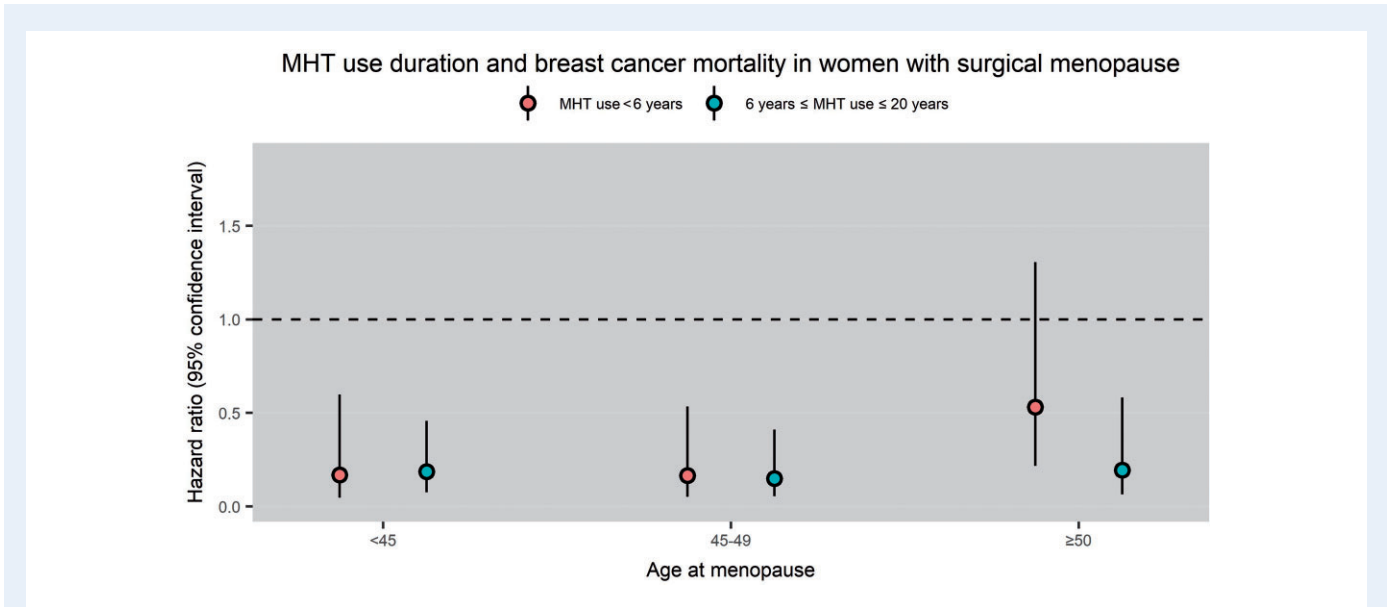

**Supplementary Figure S1.** Menopausal hormone therapy (MHT) use duration and breast cancer mortality in women with surgical menopause.
