# Supplementary material for: Menopause, hysterectomy, menopausal hormone therapy and cause-specific mortality: cohort study of UK Biobank participants
Source: PubMed Central journal article supplement — Hum Reprod. 2022 Jun 12;37(9):2175–85. doi: 10.1093/humrep/deac137 (PMC9433845; doi:10.1093/humrep/deac137), 2022-06-12
Supplement: deac137_supplementary_table_si.pdf [file deac137_supplementary_table_si.pdf]

**Supplementary Table S1 Association between age at menopause, age at hysterectomy and CVD mortality.**

| Age at menopause or age at hysterectomy<br>(number of women) | Number of<br>CVD deaths | Model I<br>HR (95% CI) | Model II<br>HR (95% CI) |
|--------------------------------------------------------------|-------------------------|------------------------|-------------------------|
| Natural menopause                                            |                         |                        |                         |
| <40 (2548)                                                   | 35                      | 3.18 (2.23, 4.52)      | 2.38 (1.64, 3.45)       |
| 40–44 (10 045)                                               | 81                      | 1.59 (1.24, 2.04)      | 1.41 (1.09, 1.82)       |
| 45–49 (32 274)                                               | 234                     | 1.54 (1.29, 1.84)      | 1.41 (1.17, 1.69)       |
| 50–52 (50 345)                                               | 261                     | Reference              | Reference               |
| ≥53 (41 578)                                                 | 235                     | 1.00 (0.83, 1.19)      | 1.03 (0.85, 1.23)       |
| Surgical menopause                                           |                         |                        |                         |
| <40 (2534)                                                   | 19                      | 1.78 (1.12, 2.84)      | 1.40 (0.86, 2.26)       |
| 40–44 (3652)                                                 | 22                      | 1.55 (1.01, 2.40)      | 1.12 (0.69, 1.80)       |
| 45–49 (6064)                                                 | 29                      | 1.03 (0.70, 1.50)      | 0.88 (0.58, 1.33)       |
| 50–52 (3405)                                                 | 24                      | 1.16 (0.77, 1.77)      | 1.20 (0.78, 1.84)       |
| ≥53 (1914)                                                   | 5                       | 0.40 (0.17, 0.97)      | 0.44 (0.18, 1.06)       |
| Hysterectomy                                                 |                         |                        |                         |
| <40 (9054)                                                   | 87                      | 1.95 (1.53, 2.48)      | 1.60 (1.23, 2.07)       |
| 40–44 (7953)                                                 | 63                      | 1.40 (1.06, 1.85)      | 1.36 (1.02, 1.81)       |
| 45–49 (4985)                                                 | 20                      | 0.64 (0.41, 1.01)      | 0.64 (0.40, 1.03)       |
| 50–52 (1269)                                                 | 8                       | 1.02 (0.50, 2.05)      | 1.01 (0.48, 2.15)       |
| ≥53 (759)                                                    | 2                       | 0.42 (0.10, 1.67)      | 0.45 (0.11, 1.82)       |

Model I: included age at menopause or age at hysterectomy; Model II: adjusted for race/ethnicity, year of birth, BMI, smoking, years of education, age at menarche, parity and family history of CVD.

CVD, cardiovascular diseases; HR, hazard ratio.
