# Supplementary material for: Menopause, hysterectomy, menopausal hormone therapy and cause-specific mortality: cohort study of UK Biobank participants
Source: PubMed Central journal article supplement — Hum Reprod. 2022 Jun 12;37(9):2175–85. doi: 10.1093/humrep/deac137 (PMC9433845; doi:10.1093/humrep/deac137), 2022-06-12
Supplement: deac137_supplementary_table_sii.pdf [file deac137_supplementary_table_sii.pdf]

**Supplementary Table SII Association between age at menopause, age at hysterectomy and cancer mortality.**

| Age at menopause or age at hysterectomy<br>(number of women) | Number of<br>cancer deaths | Model I<br>HR (95% CI) | Model II<br>HR (95% CI) |
|--------------------------------------------------------------|----------------------------|------------------------|-------------------------|
| Natural menopause                                            |                            |                        |                         |
| <40 (2548)                                                   | 50                         | 1.51 (1.13, 2.01)      | 1.21 (0.90, 1.63)       |
| 40–44 (10 045)                                               | 195                        | 1.31 (1.12, 1.53)      | 1.19 (1.01, 1.40)       |
| 45–49 (32 274)                                               | 582                        | 1.29 (1.15, 1.43)      | 1.19 (1.06, 1.33)       |
| 50–52 (50 345)                                               | 773                        | Reference              | Reference               |
| ≥53 (41 578)                                                 | 644                        | 0.94 (0.84, 1.04)      | 0.98 (0.88, 1.09)       |
| Surgical menopause                                           |                            |                        |                         |
| <40 (2534)                                                   | 41                         | 1.31 (0.95, 1.79)      | 1.11 (0.81, 1.53)       |
| 40–44 (3652)                                                 | 64                         | 1.45 (1.13, 1.88)      | 1.23 (0.95, 1.60)       |
| 45–49 (6064)                                                 | 90                         | 1.03 (0.83, 1.28)      | 0.98 (0.78, 1.23)       |
| 50–52 (3405)                                                 | 51                         | 0.85 (0.64, 1.13)      | 0.88 (0.66, 1.18)       |
| ≥53 (1914)                                                   | 40                         | 1.14 (0.83, 1.57)      | 1.28 (0.93, 1.75)       |
| Hysterectomy                                                 |                            |                        |                         |
| <40 (9054)                                                   | 157                        | 1.19 (1.00, 1.41)      | 1.11 (0.93, 1.32)       |
| 40–44 (7953)                                                 | 127                        | 0.98 (0.81, 1.18)      | 0.96 (0.79, 1.17)       |
| 45–49 (4985)                                                 | 76                         | 0.87 (0.68, 1.10)      | 0.90 (0.70, 1.14)       |
| 50–52 (1269)                                                 | 14                         | 0.63 (0.37, 1.06)      | 0.68 (0.39, 1.18)       |
| ≥53 (759)                                                    | 11                         | 0.82 (0.45, 1.49)      | 0.93 (0.51, 1.68)       |

Model I: included age at menopause or age at hysterectomy; Model II: adjusted for race/ethnicity, year of birth, BMI, smoking, years of education, age at menarche, parity and family history of cancer.

HR, hazard ratio.
