# Supplementary material for: Menopause, hysterectomy, menopausal hormone therapy and cause-specific mortality: cohort study of UK Biobank participants
Source: PubMed Central journal article supplement — Hum Reprod. 2022 Jun 12;37(9):2175–85. doi: 10.1093/humrep/deac137 (PMC9433845; doi:10.1093/humrep/deac137), 2022-06-12
Supplement: deac137_supplementary_table_siii.pdf [file deac137_supplementary_table_siii.pdf]

**Supplementary Table SIII Association between age at menopause, age at hysterectomy and mortality from all other causes.**

| Age at menopause or age at hysterectomy<br>(number of women) | Number of deaths from<br>all other causes | Model I<br>HR (95% CI) | Model II<br>HR (95% CI) |
|--------------------------------------------------------------|-------------------------------------------|------------------------|-------------------------|
| Natural menopause                                            |                                           |                        |                         |
| <40 (2548)                                                   | 97                                        | 1.82 (1.48, 2.24)      | 1.49 (1.20, 1.86)       |
| 40–44 (10 045)                                               | 305                                       | 1.26 (1.11, 1.43)      | 1.15 (1.01, 1.31)       |
| 45–49 (32 274)                                               | 801                                       | 1.10 (1.01, 1.20)      | 1.04 (0.95, 1.14)       |
| 50–52 (50 345)                                               | 1241                                      | Reference              | Reference               |
| ≥53 (41 578)                                                 | 995                                       | 0.89 (0.82, 0.97)      | 0.92 (0.84, 1.00)       |
| Surgical menopause                                           |                                           |                        |                         |
| <40 (2534)                                                   | 67                                        | 1.31 (1.03, 1.68)      | 1.10 (0.85, 1.42)       |
| 40–44 (3652)                                                 | 88                                        | 1.27 (1.02, 1.57)      | 1.10 (0.88, 1.38)       |
| 45–49 (6064)                                                 | 168                                       | 1.22 (1.04, 1.44)      | 1.21 (1.03, 1.43)       |
| 50–52 (3405)                                                 | 116                                       | 1.20 (0.99, 1.45)      | 1.22 (1.00, 1.48)       |
| ≥53 (1914)                                                   | 62                                        | 1.07 (0.83, 1.38)      | 1.14 (0.88, 1.48)       |
| Hysterectomy                                                 |                                           |                        |                         |
| <40 (9054)                                                   | 261                                       | 1.22 (1.07, 1.39)      | 1.13 (0.99, 1.30)       |
| 40–44 (7953)                                                 | 193                                       | 0.91 (0.78, 1.06)      | 0.92 (0.79, 1.08)       |
| 45–49 (4985)                                                 | 124                                       | 0.85 (0.71, 1.02)      | 0.87 (0.72, 1.05)       |
| 50–52 (1269)                                                 | 26                                        | 0.71 (0.48, 1.05)      | 0.72 (0.47, 1.08)       |
| ≥53 (759)                                                    | 29                                        | 1.30 (0.90, 1.88)      | 1.35 (0.92, 1.98)       |

Model I: included age at menopause or age at hysterectomy; Model II: adjusted for race/ethnicity, year of birth, BMI, smoking, years of education, age at menarche and parity.  
HR, hazard ratio.
