# Supplementary material for: Menopause, hysterectomy, menopausal hormone therapy and cause-specific mortality: cohort study of UK Biobank participants
Source: PubMed Central journal article supplement — Hum Reprod. 2022 Jun 12;37(9):2175–85. doi: 10.1093/humrep/deac137 (PMC9433845; doi:10.1093/humrep/deac137), 2022-06-12
Supplement: deac137_supplementary_table_svii.pdf [file deac137_supplementary_table_svii.pdf]

**Supplementary Table SVII Association between age at menopause, age at hysterectomy and cause-specific mortality (Fine and Gray competing risk model).**

| Age at menopause or age at hysterectomy | CVD mortality<br>SHR (95% CI) | Cancer mortality<br>SHR (95% CI) | Mortality from all other causes<br>SHR (95% CI) |
|-----------------------------------------|-------------------------------|----------------------------------|-------------------------------------------------|
| Natural menopause                       |                               |                                  |                                                 |
| <40                                     | 2.32 (1.62, 3.34)             | 1.17 (0.87, 1.56)                | 1.47 (1.18, 1.83)                               |
| 40–44                                   | 1.37 (1.07, 1.77)             | 1.16 (0.99, 1.37)                | 1.13 (0.99, 1.29)                               |
| 45–49                                   | 1.40 (1.17, 1.68)             | 1.17 (1.05, 1.31)                | 1.03 (0.94, 1.13)                               |
| 50–52                                   | Reference                     | Reference                        | Reference                                       |
| ≥53                                     | 1.03 (0.86, 1.23)             | 0.97 (0.87, 1.08)                | 0.92 (0.85, 1.00)                               |
| Surgical menopause                      |                               |                                  |                                                 |
| <40                                     | 1.40 (0.88, 2.22)             | 1.10 (0.80, 1.50)                | 1.09 (0.84, 1.41)                               |
| 40–44                                   | 1.14 (0.71, 1.82)             | 1.26 (0.97, 1.63)                | 1.08 (0.86, 1.35)                               |
| 45–49                                   | 0.92 (0.62, 1.37)             | 0.98 (0.78, 1.23)                | 1.21 (1.03, 1.43)                               |
| 50–52                                   | 1.16 (0.75, 1.78)             | 0.88 (0.66, 1.17)                | 1.21 (1.00, 1.48)                               |
| ≥53                                     | 0.43 (0.18, 1.03)             | 1.27 (0.92, 1.74)                | 1.13 (0.88, 1.47)                               |
| Hysterectomy                            |                               |                                  |                                                 |
| <40                                     | 1.60 (1.24, 2.07)             | 1.10 (0.93, 1.32)                | 1.12 (0.98, 1.29)                               |
| 40–44                                   | 1.35 (1.02, 1.79)             | 0.98 (0.81, 1.18)                | 0.91 (0.78, 1.07)                               |
| 45–49                                   | 0.64 (0.40, 1.02)             | 0.92 (0.73, 1.17)                | 0.87 (0.72, 1.06)                               |
| 50–52                                   | 1.00 (0.47, 2.11)             | 0.68 (0.39, 1.17)                | 0.72 (0.48, 1.09)                               |
| ≥53                                     | 0.45 (0.11, 1.78)             | 0.93 (0.51, 1.68)                | 1.36 (0.93, 1.98)                               |

Model included age at menopause or age at hysterectomy, race/ethnicity, year of birth, BMI, smoking, years of education, age at menarche and parity.  
CVD, cardiovascular diseases; SHR, sub-distribution hazard ratio.
