# Supplementary material for: Menopause, hysterectomy, menopausal hormone therapy and cause-specific mortality: cohort study of UK Biobank participants
Source: PubMed Central journal article supplement — Hum Reprod. 2022 Jun 12;37(9):2175–85. doi: 10.1093/humrep/deac137 (PMC9433845; doi:10.1093/humrep/deac137), 2022-06-12
Supplement: deac137_supplementary_table_sviii.pdf [file deac137_supplementary_table_sviii.pdf]

**Supplementary Table SVIII Association between age at menopause, age at hysterectomy and cause-specific mortality (with missing data on covariates imputed).**

| Age at menopause or age at hysterectomy | CVD mortality<br>HR (95% CI) | Cancer mortality<br>HR (95% CI) | Mortality from all other causes<br>HR (95% CI) |
|-----------------------------------------|------------------------------|---------------------------------|------------------------------------------------|
| Natural menopause                       |                              |                                 |                                                |
| <40                                     | 2.36 (1.65, 3.36)            | 1.22 (0.91, 1.63)               | 1.55 (1.26, 1.91)                              |
| 40–44                                   | 1.33 (1.04, 1.71)            | 1.17 (1.00, 1.37)               | 1.16 (1.02, 1.32)                              |
| 45–49                                   | 1.39 (1.17, 1.66)            | 1.19 (1.07, 1.33)               | 1.04 (0.95, 1.14)                              |
| 50–52                                   | Reference                    | Reference                       | Reference                                      |
| ≥53                                     | 1.02 (0.85, 1.21)            | 0.97 (0.87, 1.08)               | 0.91 (0.84, 0.99)                              |
| Surgical menopause                      |                              |                                 |                                                |
| <40                                     | 1.34 (0.84, 2.15)            | 1.06 (0.78, 1.46)               | 1.11 (0.87, 1.42)                              |
| 40–44                                   | 1.26 (0.81, 1.94)            | 1.24 (0.96, 1.60)               | 1.11 (0.89, 1.38)                              |
| 45–49                                   | 0.94 (0.64, 1.38)            | 0.99 (0.80, 1.23)               | 1.17 (1.00, 1.38)                              |
| 50–52                                   | 1.15 (0.75, 1.74)            | 0.88 (0.66, 1.17)               | 1.23 (1.02, 1.49)                              |
| ≥53                                     | 0.41 (0.17, 0.99)            | 1.21 (0.88, 1.66)               | 1.12 (0.87, 1.44)                              |
| Hysterectomy                            |                              |                                 |                                                |
| <40                                     | 1.71 (1.34, 2.18)            | 1.10 (0.92, 1.30)               | 1.14 (1.00, 1.31)                              |
| 40–44                                   | 1.32 (1.00, 1.74)            | 0.98 (0.81, 1.18)               | 0.91 (0.78, 1.05)                              |
| 45–49                                   | 0.63 (0.40, 0.99)            | 0.90 (0.71, 1.15)               | 0.87 (0.72, 1.05)                              |
| 50–52                                   | 1.07 (0.53, 2.17)            | 0.70 (0.41, 1.19)               | 0.76 (0.52, 1.13)                              |
| ≥53                                     | 0.42 (0.10, 1.69)            | 0.87 (0.48, 1.59)               | 1.35 (0.94, 1.96)                              |

Model included age at menopause or age at hysterectomy, race/ethnicity, year of birth, BMI, smoking, years of education, age at menarche, parity, family history of CVD (model for CVD mortality) and family history of cancer (model for cancer mortality).  
CVD, cardiovascular diseases; HR, hazard ratio.
